# Supplementary material for: The Effects of Trans-Basin Climate Variability on Skipjack Tuna in the Northwest Pacific Ocean: Causal and Nonstationary
Source: Frontiers journal article supplement (doi:10.3389/fmars.2022.895219), 2022-07-18
Supplement: Data_Sheet_1.docx [file Data_Sheet_1.docx]

**Supplementary Materials**


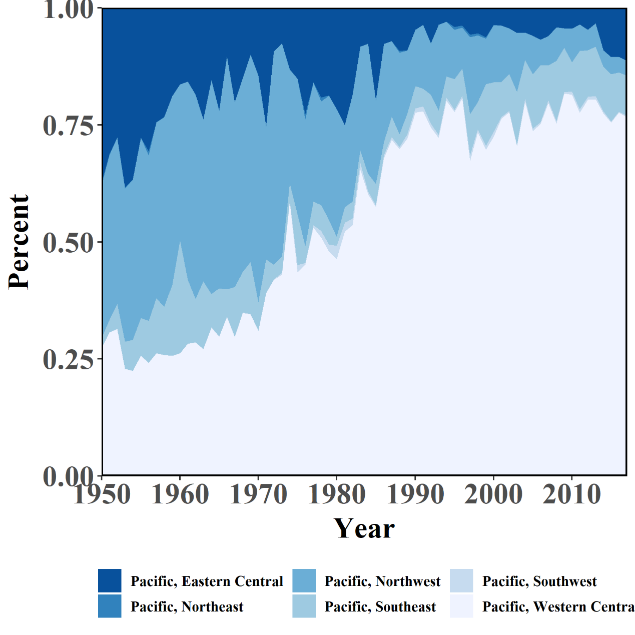


**Figure S1. The composition of skipjack tuna catches in the pacific from 1950–2019 (FAO).** The different colors represent the catch in six major fishing areas.


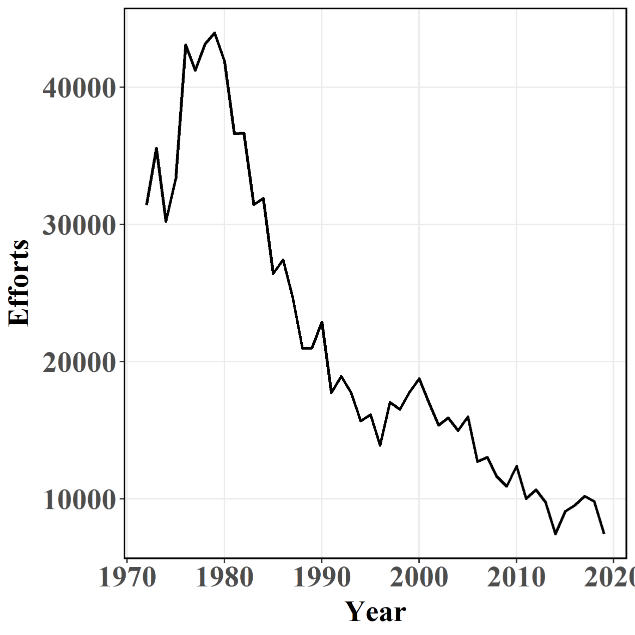


**Figure S2. Timeseries variations of skipjack tuna effort (days) during 1972–2019.**


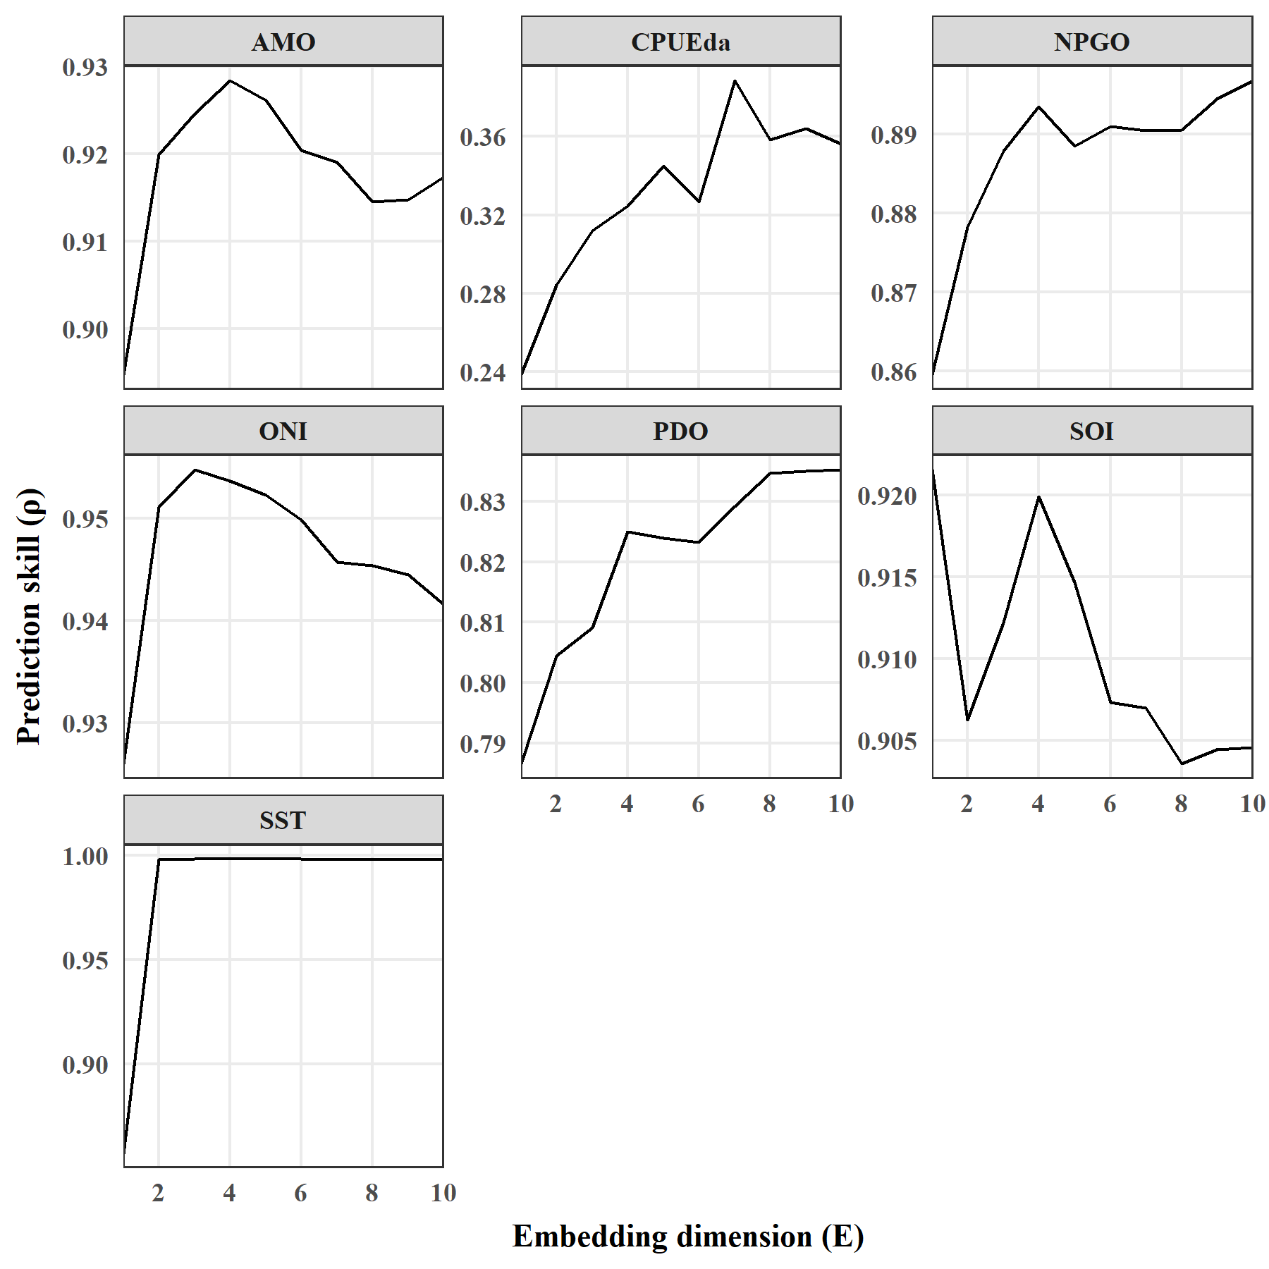


**Figure S3. The optimal embedding dimensions of** **the time series**.


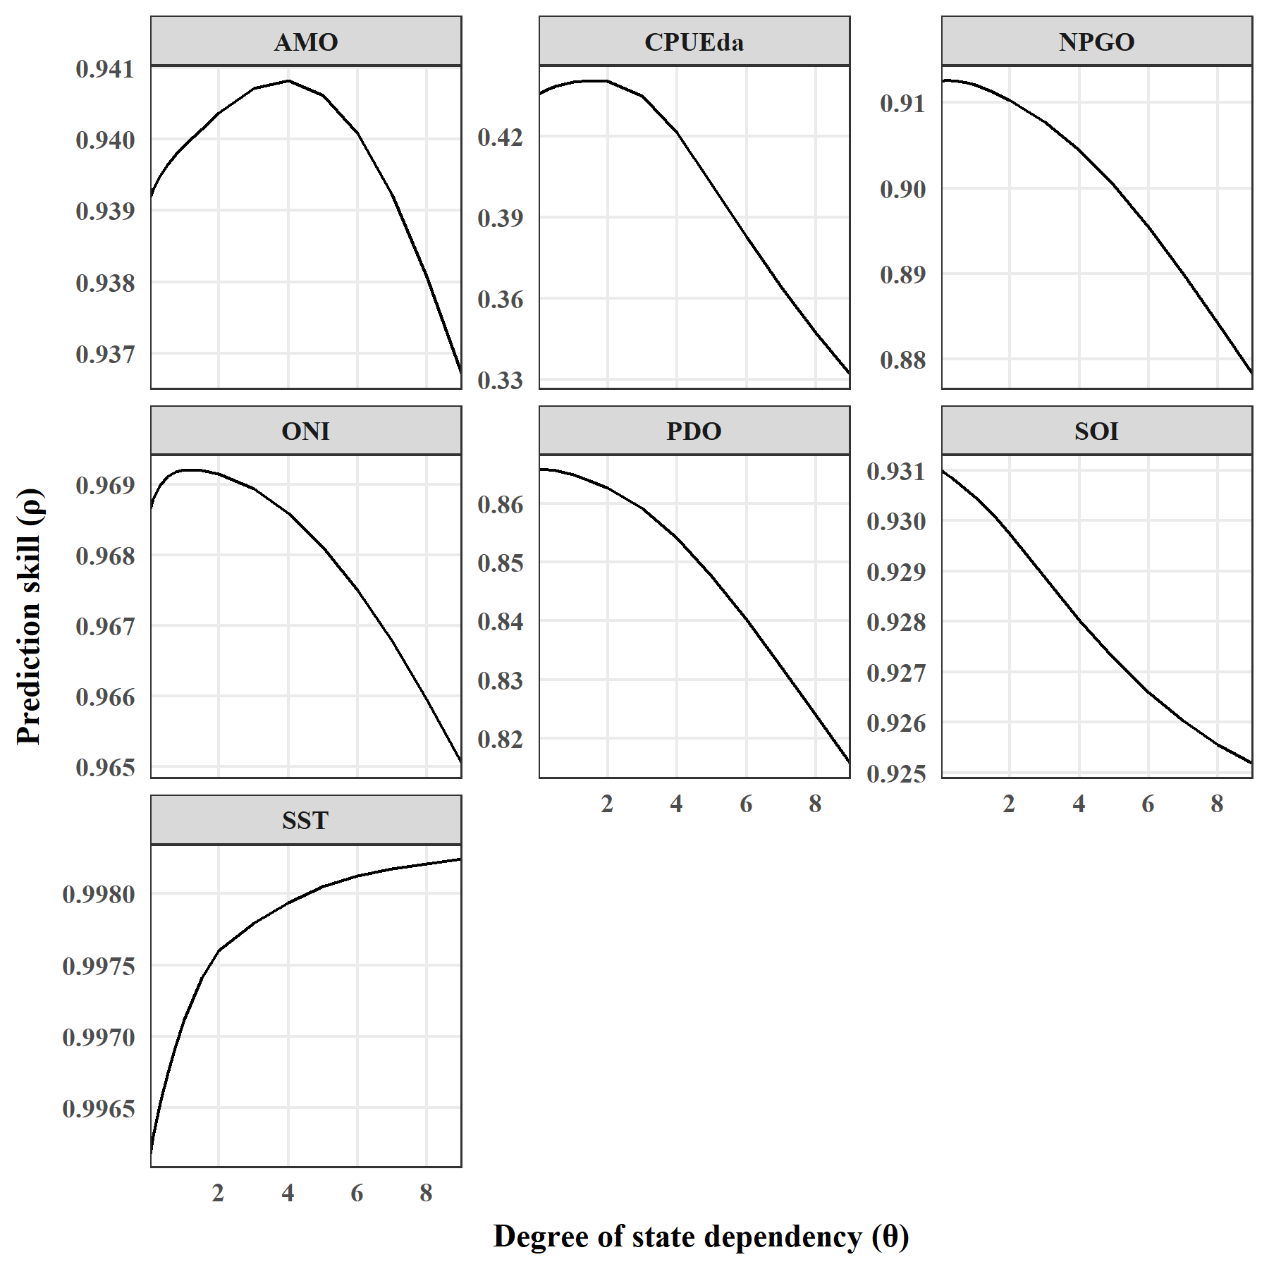


**Figure S4. The identification and quantification of nonlinearity of the time series**.


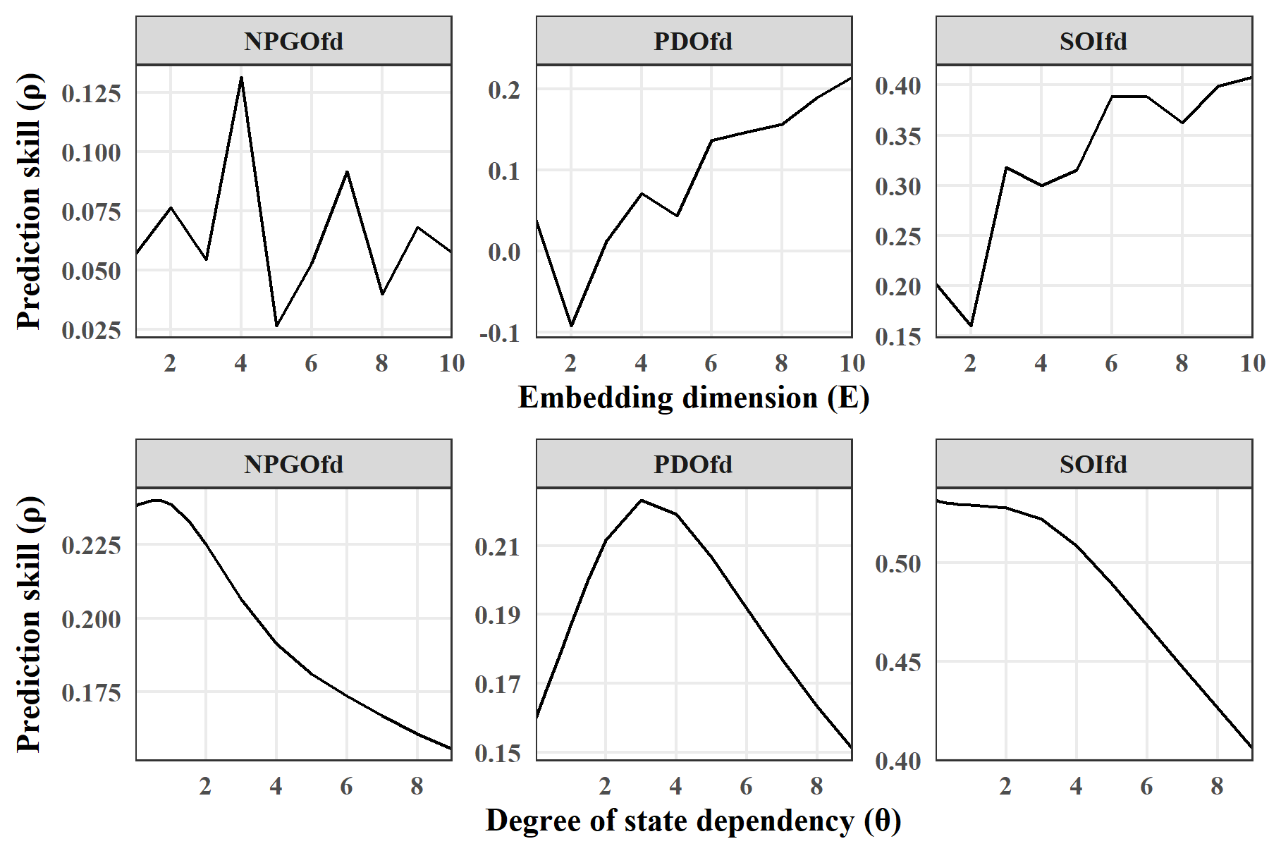


**Figure S5. The nonlinearity tests of the first-differenced indices (NPGOfd, PDOfd, SOIfd).** The first row represents the optimal embedding dimensions of climate indices at the state space level; the second row represents the identification and quantification of nonlinearity of climate indices.


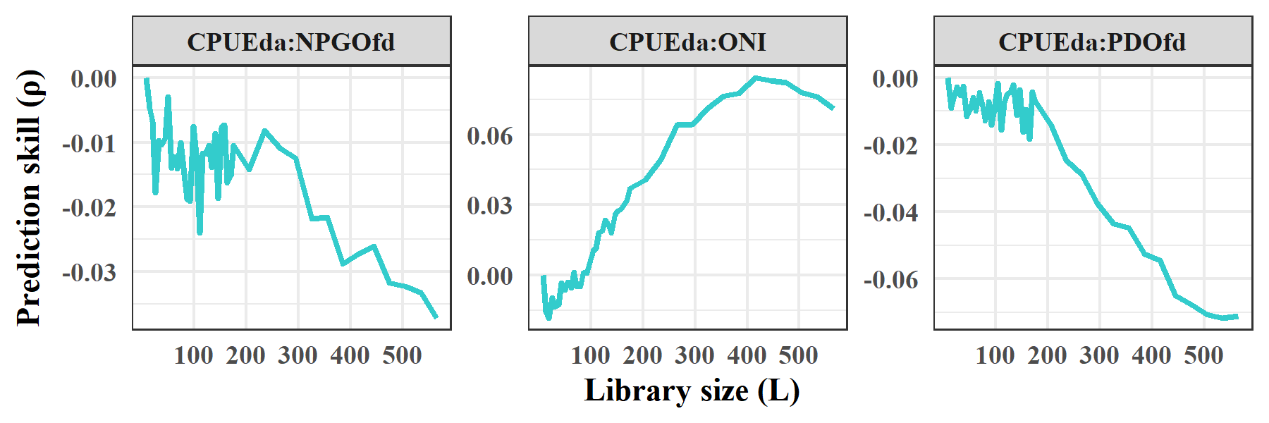


**Figure S6. The CCM results between CPUEda and climate indices (NPGOfd, ONI, PDOfd).** Blue lines represent the climate indices effect on CPUE.


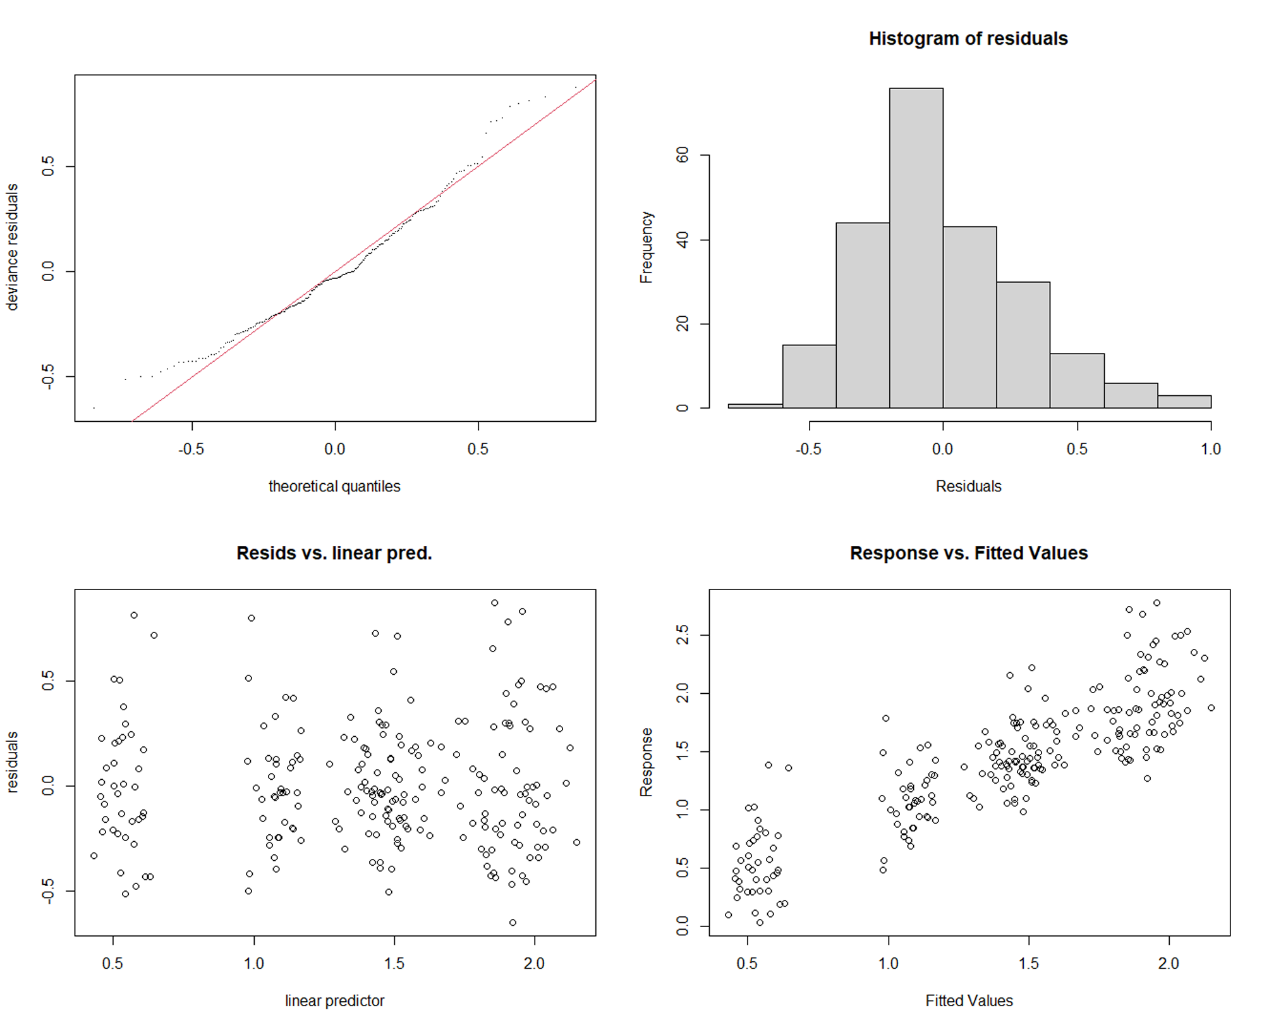


**Figure S7. Graphical residuals exploration results for the model during the first era (1972−1991)**


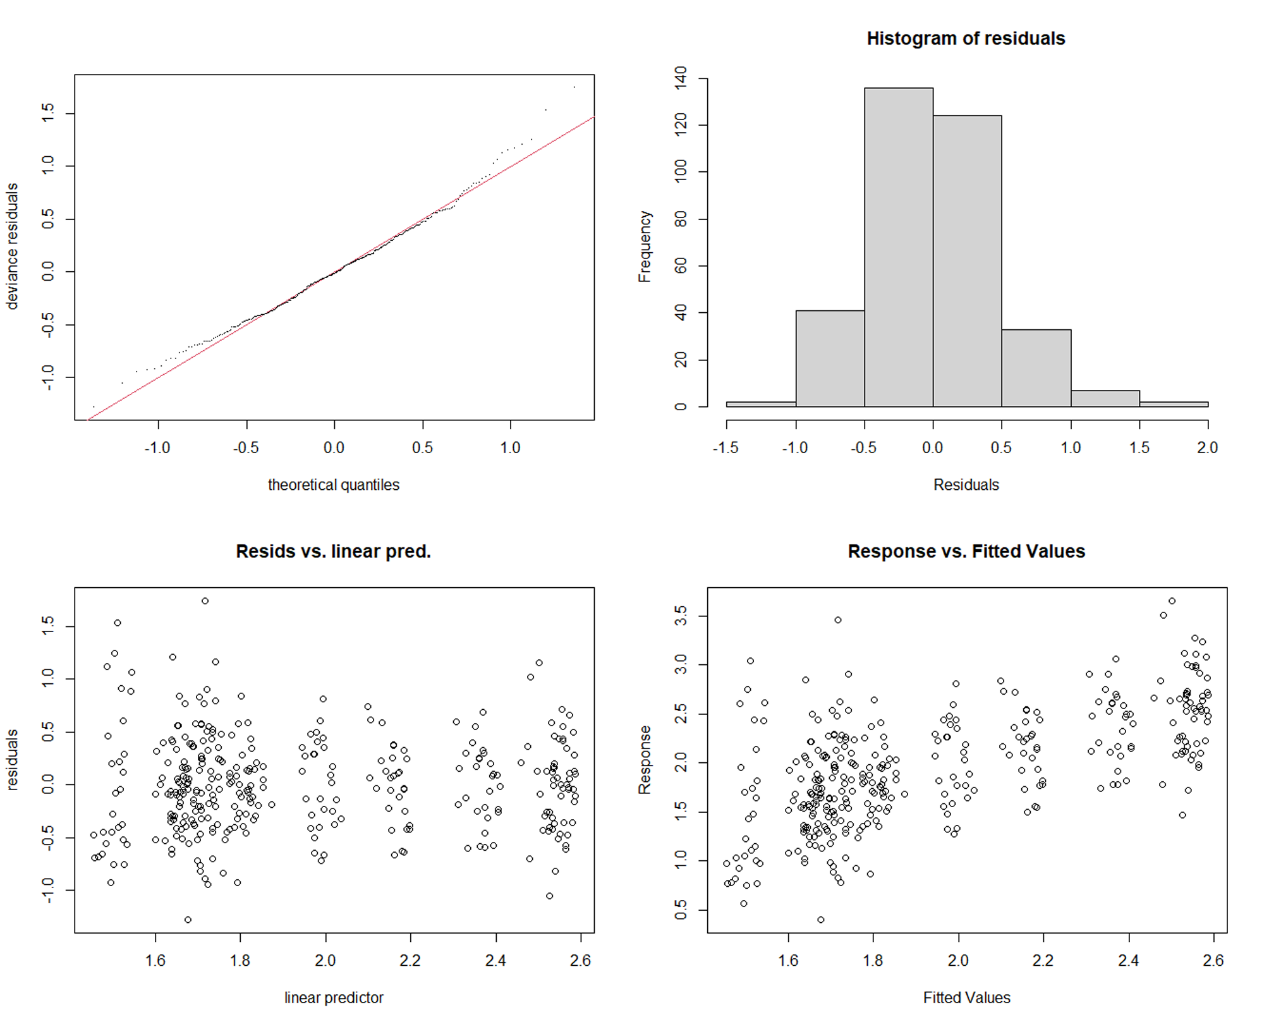


**Figure S8. Graphical residuals exploration results for the model during the second era (1992–2019)**

**Table S1. Linear Correlations between SKJ CPUEda and climate indices during 1972–2019.**

| **Climate indices correlated with CPUEda** | **r** | **ρ** |
| --- | --- | --- |
| **NPGO** | **−0.118*** | **<0.05** |
| ONI | −0.019 | >0.05 |
| PDO | 0.080 | >0.05 |
| SOI | −0.036 | >0.05 |
| AMO | −0.004 | >0.05 |

* means coefficients significant at 0.05.
